# Supplementary material for: Eco-Toxic Risk Assessment of Nearshore Sediments in Bay of Bengal - Environmental Radioactivity and Ecological Risk as a Proxy
Source: Research Square preprint supplement (doi:10.21203/rs.3.rs-1454882/v1), 2022-03-22
Supplement: Supplementary file 1 [file ee07f4a94b3c48b17692356e.docx]

**<Supplementary Information>**

**Eco-toxic risk assessment of nearshore sediments in Bay of Bengal - Environmental radioactivity and ecological risk as a proxy**

**Manikanda Bharath Karuppasamy1,2*, Usha Natesan2*, Chandrasekaran Seethapathy3, Srinivasalu Seshachalam1**

1Institute for Ocean Management, Anna University, Chennai – 600025, Tamil Nadu, India, (https://orcid.org/0000-0002-3159-8098).

2National Institute of Technical Teachers Training and Research (NITTTR) Chennai –600113, Tamil Nadu, India.

3Radiological Safety Division Health Safety and Environmental Group, Indira Gandhi Centre for Atomic Research, Kalpakkam-603102, Tamil Nadu, India.

***Corresponding author: krmanibharath93@gmail.com;** **u_natesan@yahoo.com**

Supplementary Figures S1, S2 and S3 supplementary information of water depth, sedimentological characteristics, and sediments pollution types:


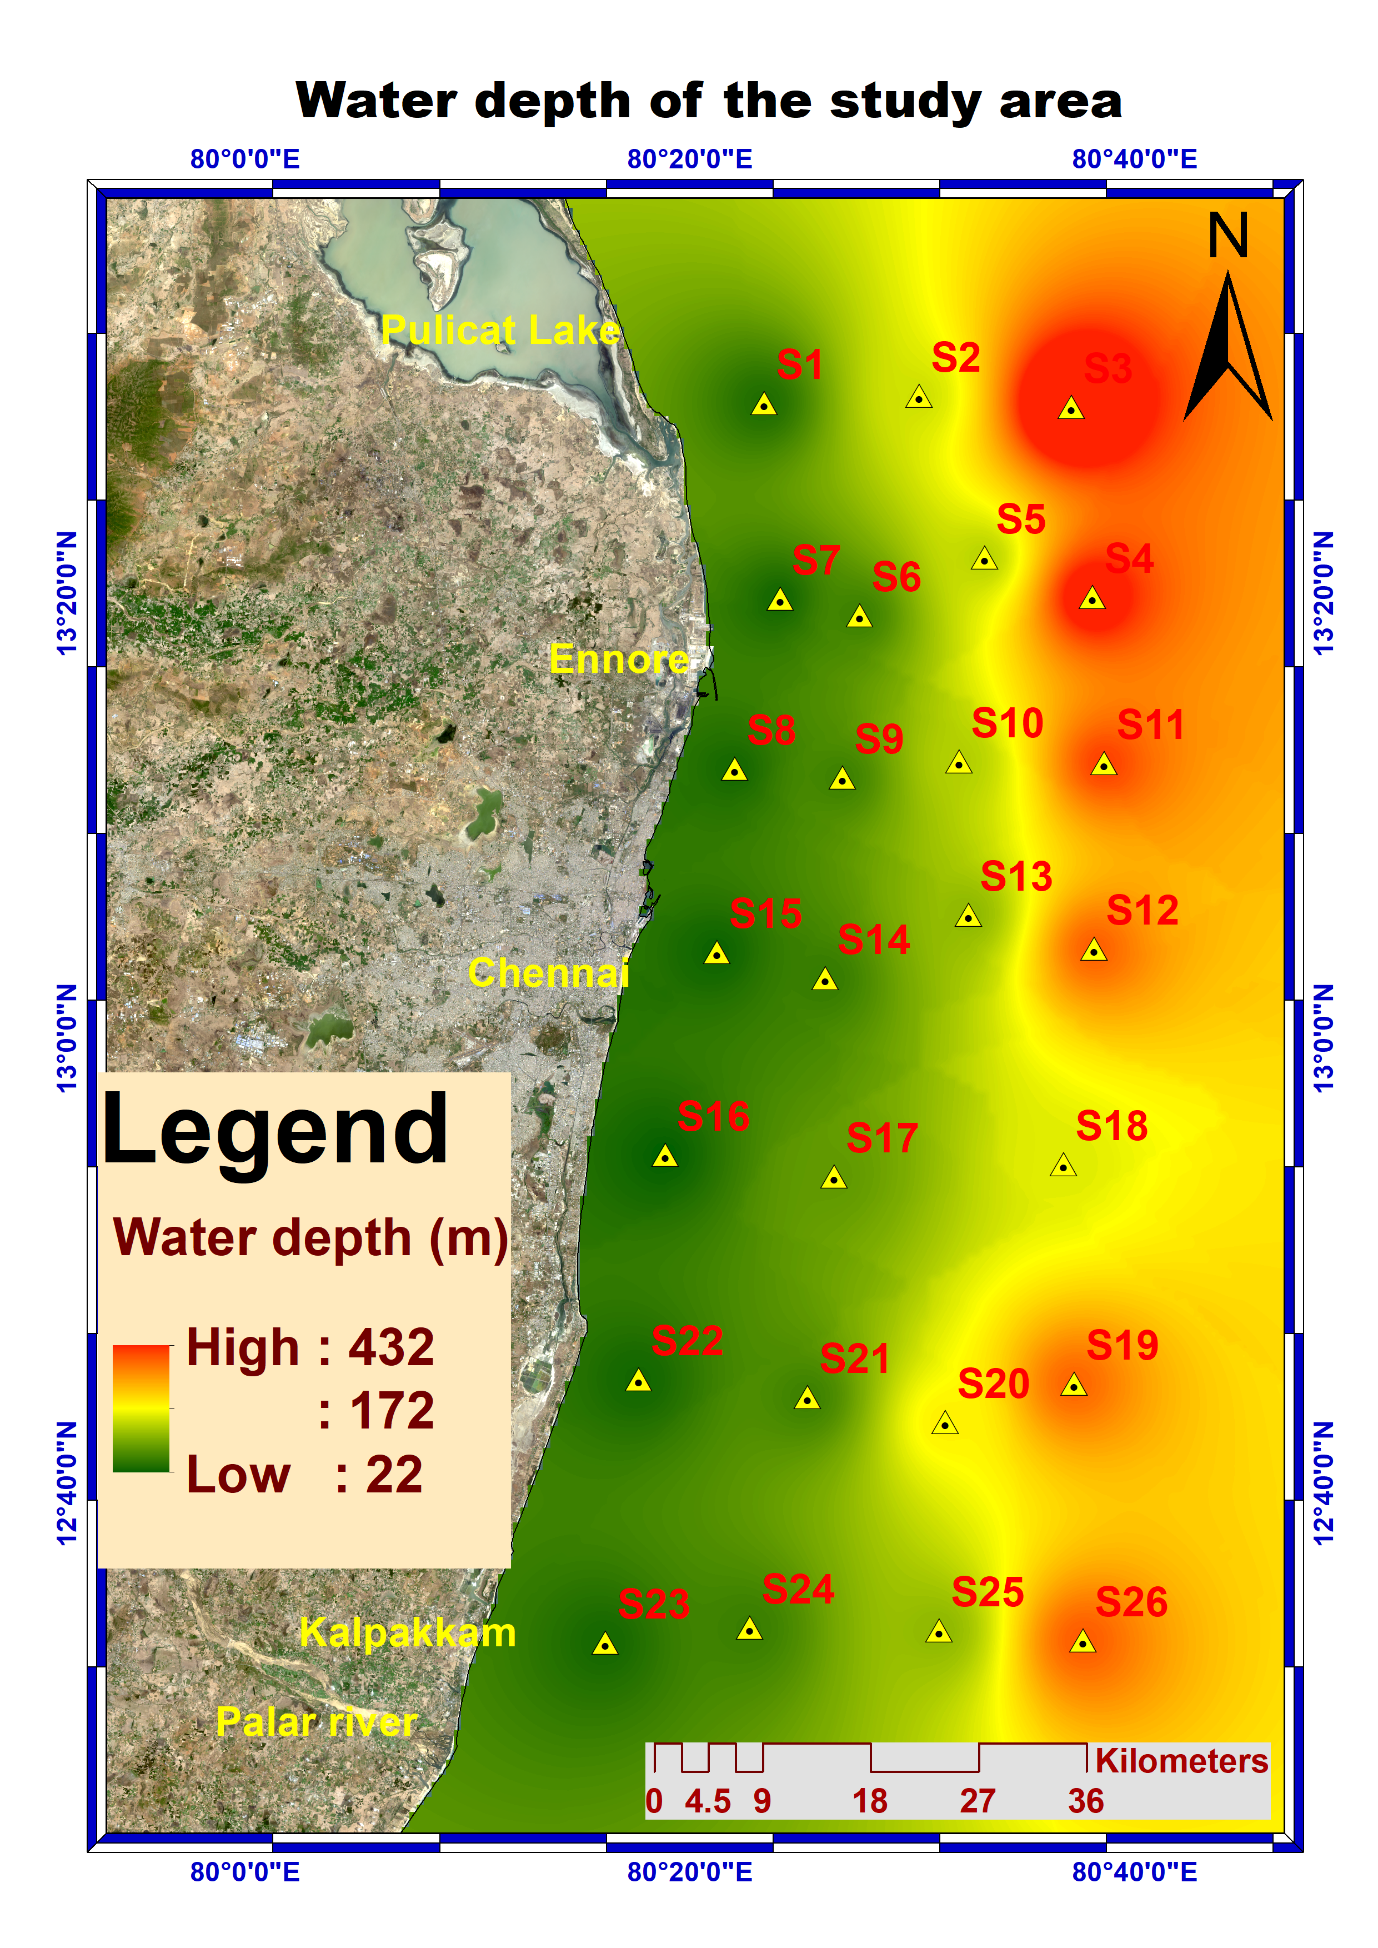
**Fig. S1. Water depth of sampling sites in the study area**


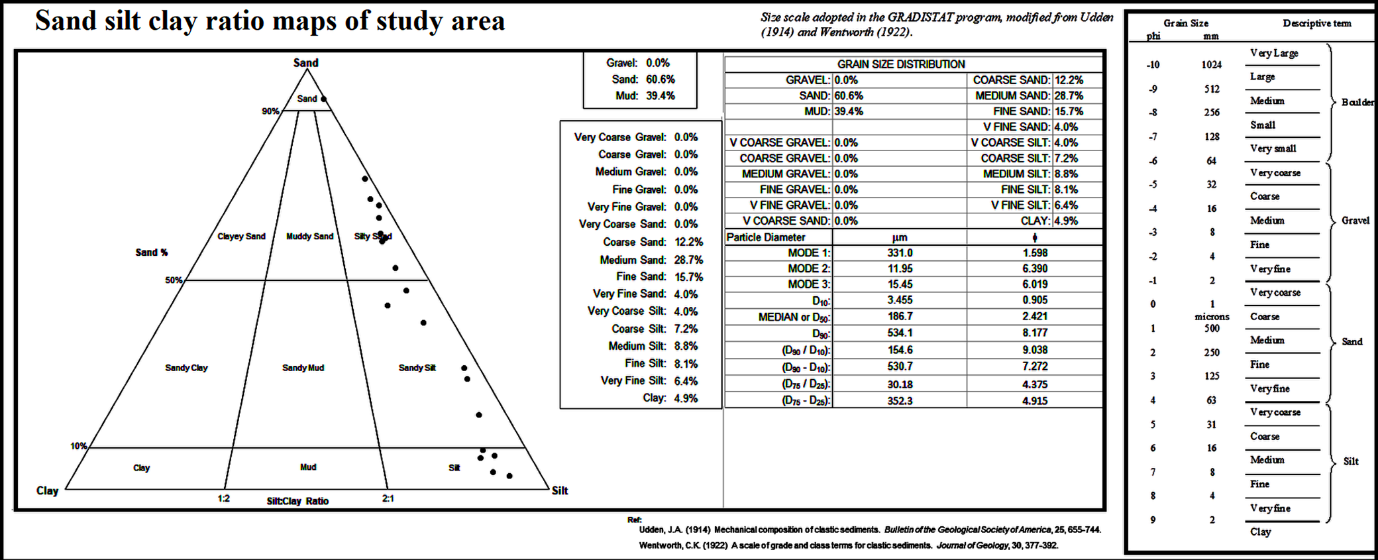
**Fig. S2. Sedimentological characteristics of the study area**


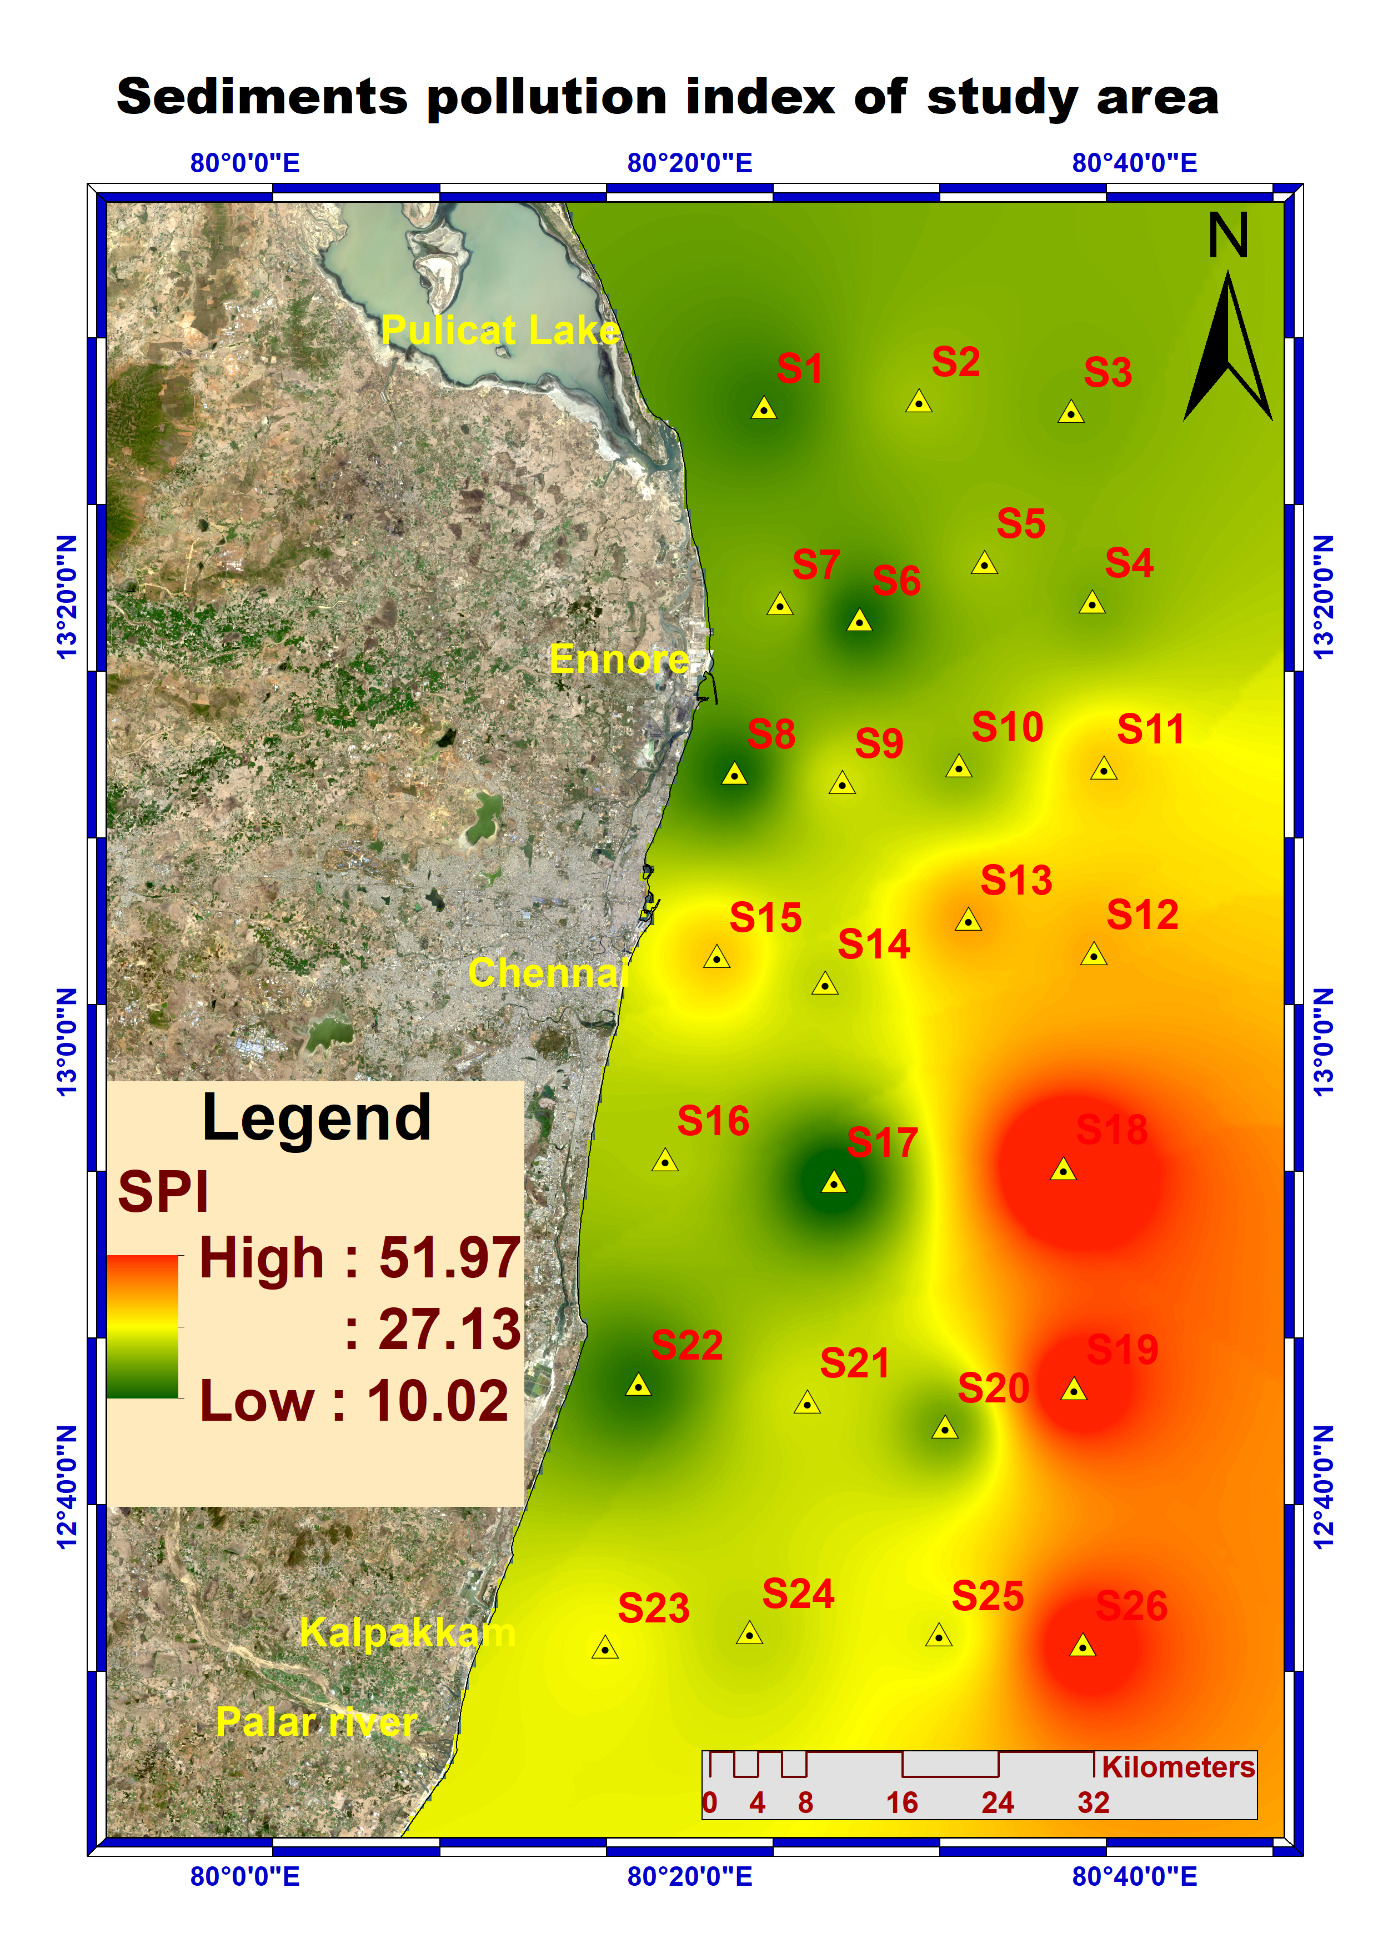
**Fig. S3**. **Spatial variation of the Sediment pollution index (SPI) in the study area**
